1 **SNF1-related protein kinase 2 directly regulate group C Raf-like protein**  
2 **kinases in abscisic acid signaling**

3

4 **Yoshiaki Kamiyama<sup>1</sup>, Misaki Hirotsu<sup>1</sup>, Shinnosuke Ishikawa<sup>1</sup>, Fuko Minegishi<sup>1</sup>,**  
5 **Sotaro Katagiri<sup>1</sup>, Fuminori Takahashi<sup>2</sup>, Mika Nomoto<sup>3,4</sup>, Kazuya Ishikawa<sup>5</sup>,**  
6 **Yutaka Kodama<sup>5</sup>, Yasuomi Tada<sup>3,4</sup>, Daisuke Takezawa<sup>6</sup>, Scott C. Peck<sup>7</sup>, Kazuo**  
7 **Shinozaki<sup>2</sup>, Taishi Umezawa<sup>1,8,9\*</sup>**

8

9 Author Affiliations

- 10 1. Graduate School of Bio-Applications and Systems Engineering, Tokyo  
11 University of Agriculture and Technology, Tokyo 184-8588, Japan.
- 12 2. Gene Discovery Research Group, RIKEN Center for Sustainable Resource  
13 Science, Ibaraki 305-0074, Japan.
- 14 3. Division of Biological Science, Nagoya University, Aichi 464-8602, Japan.
- 15 4. Center for Gene Research, Nagoya University, Aichi 464-8602, Japan.
- 16 5. Center for Bioscience Research and Education, Utsunomiya University, Tochigi  
17 321-8505, Japan.
- 18 6. Graduate School of Science and Engineering, Saitama University, Saitama  
19 338-8570, Japan.
- 20 7. Department of Biochemistry, University of Missouri, Columbia, MO 65211, USA.
- 21 8. Faculty of Agriculture, Tokyo University of Agriculture and Technology, Fuchu,

22 Tokyo 183-8538, Japan.

23 9. PRESTO, Japan Science and Technology Agency, Saitama 332-0012, Japan.

24

25 **Short title:**

26 SnRK2 kinase regulates Raf kinases

27

28 **\*Correspondence:** taishi@cc.tuat.ac.jp

29

30 **Distribution statement**

31 The author responsible for distribution of materials integral to the findings presented

32 in this article in accordance with the policy described in the Instructions for Authors

33 (www. plantcell. org) is Taishi Umezawa (taishi@cc.tuat.ac.jp)

34

35 **ABSTRACT**

36 **A phytohormone abscisic acid (ABA) has a major role in abiotic stress**

37 **responses in plants, and subclass III SNF1-related protein kinase 2 (SnRK2)**

38 **mediates ABA signaling. In this study, we identified Raf36, a group C Raf-like**

39 **protein kinase in Arabidopsis, as an interacting protein with SnRK2. A series**

40 **of reverse genetic and biochemical analyses revealed that Raf36 negatively**

41 **regulates ABA responses and is directly phosphorylated by SnRK2s. In**

42 **addition, we found that Raf22, another C-type Raf-like kinase, functions**

43 **partially redundantly with Raf36 to regulate ABA responses. Comparative**  
44 **phosphoproteomic analysis using Arabidopsis wild-type and *raf22raf36-1***  
45 **plants identified proteins that are phosphorylated downstream of Raf36 and**  
46 **Raf22 *in planta*. Together, these results reveal a novel subsection of**  
47 **ABA-responsive phosphosignaling pathways branching from SnRK2.**

48

## 49 INTRODUCTION

50 Environmental stresses, such as drought, high salinity and low temperature,  
51 have adverse effects on plant growth and development. Abscisic acid (ABA) is a  
52 phytohormone that plays important roles in responses and adaptations to these  
53 stresses, as well as in embryo maturation and seed dormancy (Finkelstein, 2013;  
54 Shinozaki et al., 2003). The major ABA signaling pathway consists of three core  
55 components: ABA receptors, type 2C protein phosphatases (PP2Cs) and  
56 SNF1-related protein kinase 2s (SnRK2s) (Cutler et al., 2010; Umezawa et al.,  
57 2010). In this pathway, SnRK2s transmit ABA- or osmostress induced-signals  
58 thorough phosphorylation of downstream substrates, thereby promoting ABA- or  
59 stress-inducible gene expression and stomatal closure (Furihata et al., 2006;  
60 Geiger et al., 2009; Umezawa et al., 2013; Wang et al., 2013). The Arabidopsis  
61 genome contains 10 members of SnRK2, and they are classified into three  
62 subclasses (Hrabak et al., 2003; Yoshida et al., 2002). Among them, subclass III  
63 members, SRK2D/SnRK2.2, SRK2E/OST1/SnRK2.6 and SRK2I/SnRK2.3, are

64 essential for ABA responses (Fujii and Zhu, 2009; Fujita et al., 2009; Nakashima et  
65 al., 2009; Umezawa et al., 2009).

66 Raf-like protein kinases were recently identified as regulators of ABA  
67 signaling. Among 80 putative MAPKKKs in Arabidopsis, 48 members are  
68 categorized as Raf-like subfamilies and can further be divided into 11 subgroups  
69 (B1- B4 and C1- C7) (Ichimura et al., 2002). In *Physcomitrella patens*, the *ARK*  
70 (also named *ANR* or *CTR1L*) gene is required for ABA-responsive  
71 SnRK2-activation, gene expression and drought, osmotic and freezing tolerance  
72 (Saruhashi et al., 2015; Stevenson et al., 2016; Yasumura et al., 2015). *ARK*  
73 encodes a B3 subgroup Raf-like protein kinase that phosphorylates SnRK2s *in vitro*,  
74 suggesting that ARK functions as a upstream kinase of SnRK2s (Saruhashi et al.,  
75 2015). In Arabidopsis, the B2 subgroup kinases Raf10 and Raf11 positively regulate  
76 seed dormancy and ABA responses by directly phosphorylating and activating  
77 subclass III SnRK2s (Lee et al., 2015; Nguyen et al., 2019). In addition to group B  
78 kinases, several group C Raf-like kinases have been associated with ABA  
79 responses. For example, Arabidopsis Raf43, a C5 kinase, promotes ABA sensitivity  
80 during seed germination and seedling root growth (Virk et al., 2015), whereas Raf22,  
81 a member of C6 subgroup, negatively regulates stress- or ABA-induced growth  
82 arrest (Hwang et al., 2018). However, despite these ABA-related genetic  
83 phenotypes, it is still unclear whether group C kinases directly regulate  
84 SnRK2-dependent signaling pathways.

85           In this study, we identified Raf36, a C5 group Raf-like kinase, as a protein  
86 that directly interacts with, and is phosphorylated by, SnRK2. Our evidence  
87 indicates that Raf36 functions as a negative regulator of ABA signaling pathway  
88 during post-germinative growth stage under the control of SnRK2. In addition, we  
89 revealed that Raf22, a C6 Raf-like kinase, functions partially redundantly with Raf36.  
90 Comparative phosphoproteomic analysis revealed that Raf36 and Raf22 are  
91 required for a subset of ABA-responsive phosphosignaling pathways. Collectively,  
92 unlike group B Rafs, which have been recently reported as an “accelerator” of ABA  
93 response upstream of SnRK2s, our results demonstrate that Arabidopsis group C  
94 Rafs, Raf22 and Raf36, functions as a “brake” of ABA response downstream of  
95 SnRK2s.

96

97

## 98 **RESULTS**

### 99 **Raf36 interacts with subclass III SnRK2**

100 To identify additional kinases that regulate ABA signaling pathways, we  
101 used the AlphaScreen<sup>®</sup> assay to screen a collection of Arabidopsis MAPKKK  
102 proteins for their ability to physically interact with SRK2I (SnRK2.3), a subclass III  
103 SnRK2. From a pilot experiment, several Raf-like protein kinases were identified as  
104 candidate interactors with SRK2I (Supplemental Figure 1). Raf36, which belongs to  
105 a C5 subgroup kinase (Supplemental Figure 2), was one of the SRK2I-interacting  
106 proteins. Interaction between Raf36 and SRK2I, as well as between Raf36 and  
107 additional subclass III SnRK2s, SRK2D (SnRK2.2) and SRK2E (OST1/SnRK2.6),  
108 was confirmed by AlphaScreen<sup>®</sup> assay (Figure 1A) and yeast two-hybrid assay  
109 (Figure 1B). SnRK2s were previously found within the cytosol and nuclei of  
110 Arabidopsis cells (Umezawa et al., 2009). We observed that Raf36-GFP is localized  
111 mainly in the cytosol (Figure 1C), and bimolecular fluorescence complementation  
112 (BiFC) assay confirmed that the interactions between SnRK2s and Raf36 take  
113 place in cytosol (Figure 1D) Together, these results demonstrate that Raf36  
114 physically interacts with ABA-responsive SnRK2s both *in vitro* and *in vivo*.

115 Next, we investigated which domain(s) of Raf36 may be responsible for the  
116 interaction with SnRK2s. According to the PROSITE database  
117 (<https://prosite.expasy.org/>), Raf36 contains an unknown N-terminal stretch (N, 1-  
118 206 aa), a predicted kinase catalytic domain (KD, 207- 467 aa) and a short

119 C-terminal domain (C, 468- 525 aa) (Figure 1E). In yeast two-hybrid assay, SRK2E  
120 strongly interacted with Raf36 full-length protein (FL), but just slightly or not  
121 interacted with Raf36 N and KD+C alone, respectively (Figure 1E). These results  
122 indicated that the complete structure of Raf36 protein is required for the interaction  
123 with SnRK2.

124

### 125 **Raf36 negatively regulates ABA response at post-germination growth stage**

126 To characterize the role of Raf36 in ABA signaling, we performed a series of  
127 functional analyses in Arabidopsis. Using qRT-PCR, we measured the abundance  
128 of *Raf36* mRNA in seedlings and detected a slight yet significant increase in *Raf36*  
129 transcripts after ABA treatment (Figure 2A). Next, we obtained two *Raf36* T-DNA  
130 insertion lines, GK-459C10 and SALK\_044426C, designated as *raf36-1* and *raf36-2*,  
131 respectively (Supplemental Figure 3A). Using RT-PCR we confirmed the loss of  
132 *Raf36* transcripts in both mutants (Supplemental Figure 3B). We then measured  
133 rates of seed germination and cotyledon greening in the presence or absence of  
134 exogenous ABA. No difference in greening rate was observed between wild-type  
135 and mutant seedlings in the absence of ABA. However, with plants treated with 0.5  
136  $\mu$ M ABA, the greening rate of *raf36* mutants was significantly slower than wild-type  
137 (Figures 2B and 2C). This ABA-hypersensitive phenotype was complemented by  
138 *CaMV35S:Raf36-GFP* (Figure 2D and Supplemental Figure 3C). To assess if the  
139 delayed greening of *raf36* requires SnRK2 signaling, we generated a triple mutant,

140 *raf36-1srk2dsrk2e*, and observed that it was less sensitive to ABA than *raf36-1*  
141 (Figures 2E and 2F). This result indicates that SRK2D and SRK2E are genetic  
142 modifiers of *raf36*-dependent ABA hyper-sensitivity in the greening response.  
143 Notably, seed germination rates were not significantly changed in either *raf36*  
144 mutant in the presence or absence of ABA (Supplemental Figure 3D). Taken  
145 together, our results suggested that Raf36 functions as a negative regulator of  
146 SnRK2-dependent ABA signaling during post-germinative growth.

147

#### 148 **Raf36 is phosphorylated by SnRK2**

149 To further examine the biochemical relationship between SnRK2 and Raf36,  
150 we prepared Raf36 and SRK2E recombinant proteins as maltose-binding protein  
151 (MBP)- or glutathione S-transferase (GST)-fusions. Raf36 protein  
152 auto-phosphorylated, demonstrating that Raf36 is an active kinase (Figure 3A). We  
153 found that Raf36 prefers  $Mn^{2+}$  for its kinase activity (Supplemental Figure 4A), as  
154 shown for other C-group Raf (Lamberti et al., 2011; Reddy and Rajasekharan,  
155 2006; Rudrabhatla et al., 2006), and SRK2E prefers  $Mg^{2+}$  for its kinase activity  
156 (Supplemental Figure 4B). We then performed *in vitro* phosphorylation assays  
157 using kinase-dead forms of Raf36 and SRK2E as substrates. SRK2E  
158 phosphorylated Raf36 (K234N), while Raf36 did not phosphorylate SRK2E (K50N)  
159 (Figure 3A). This result suggested that Raf36 is a potential substrate of SnRK2, but  
160 not vice versa.



161 Additional *in vitro* kinase assays were performed using a series of truncated  
162 versions of Raf36 to identify the phosphorylation site(s) of Raf36. First, we observed  
163 that Raf36 proteins lacking the N-terminal region (Raf 36 KD+C and Raf36 KD)  
164 were not phosphorylated, suggesting this region is important for both  
165 auto-phosphorylation by Raf36 and trans-phosphorylation by SRK2E (Figure 3B).  
166 Second, Raf36 N (1-206) and Raf36 N (1-156) recombinant proteins were strongly  
167 phosphorylated, but Raf36 N (1-140) was slightly phosphorylated by SRK2E  
168 (Supplemental Figure 4C). These data suggested that the major phosphorylation  
169 site is located within 141-156 aa of the N-terminal region. Four serine (Ser) residues  
170 (i.e., Ser<sup>141</sup>, Ser<sup>145</sup>, Ser<sup>150</sup> and Ser<sup>155</sup>) are present within this region. To identify  
171 which Ser residue(s) may be phosphorylated, we generated six peptides spanning  
172 this region of Raf36 (134-163). The peptides either contained all four serine  
173 residues (peptide #1), or had only a single Ser residue, with alanine substituted for  
174 the remaining Ser residues (peptides #2- #6) (Figure 3C). Ser<sup>157</sup> was replaced with  
175 alanine in each peptide because it was outside of phosphorylated 141-156 aa  
176 region. Of these synthetic peptides, only peptides #1 and #3 were strongly  
177 phosphorylated by SRK2E, indicating Ser<sup>145</sup> is the phosphorylation site (Figure 3D).  
178 SRK2D and SRK2I also phosphorylated Ser<sup>145</sup> of Raf36 *in vitro* (Figure 3E). Taken  
179 together, these data show that subclass III SnRK2s phosphorylate Ser<sup>145</sup> of Raf36.

180

181 **Raf22 functions partially redundantly with Raf36**

182           We next tested if Raf kinases closely-related to Raf36 are also SnRK2  
183 substrates. There are five kinases within Raf subgroups C5 and C6 (Figure 4A).  
184 Among them, HIGH LEAF TEMPERATURE 1 (HT1/ Raf19) functions independently  
185 of ABA (Hashimoto et al., 2006; Hashimoto-Sugimoto et al., 2016). Therefore, we  
186 focused our analyses on Raf43, Raf22 and Raf28. As shown in Figure 4B, SRK2E  
187 strongly phosphorylated Raf22, despite having no equivalent of Ser<sup>145</sup> of Raf36 and  
188 sharing only 29 % identity with Raf36. In addition, SRK2E only weakly or not  
189 phosphorylated Raf43 and Raf28, respectively. We next tried to identify the  
190 phosphorylation site in Raf22. As described above, Raf28 was not phosphorylated  
191 by SnRK2, albeit with having 88 % identity with Raf22. Because SnRK2 kinases  
192 prefer [-(R/K)-x-x-(S/T)-] or [-(S/T)-x-x-x-x-(E/D)-] (Furihata et al., 2006; Umezawa  
193 et al., 2013), we searched the amino acid sequences of Raf22 and Raf28 for  
194 potential SnRK2 phosphorylation sites, and identified Ser<sup>81</sup> within an [-R-H-Y-S-]  
195 motif in Raf22 that is converted to [-R-H-P-Y-S-] in Raf28. We introduced an alanine  
196 substitution at Ser<sup>81</sup> in recombinant Raf22, and observed that this substitution  
197 nearly abolished phosphorylation by SRK2E (Figure 4C), indicating this serine  
198 residue is a SnRK2-phosphorylation site.

199           Next, we functionally characterized the role of Raf22 in ABA-related  
200 phenotypes. Similar to *Raf36*, transcriptional level of *Raf22* was slightly  
201 up-regulated after exogenous ABA treatment (Supplemental Figure 5A). Using BiFC  
202 assay, we observed interaction between Raf22 and SnRK2s *in vivo* (Figure 4D and

203 Supplemental Figure 5B). A T-DNA insertional mutant (SALK\_105195C), *raf22*,  
204 showed a similar phenotype to *raf36*, i.e. ABA hypersensitivity in the  
205 post-germination growth (Figure 4E and 4F) but not in seed germination  
206 (Supplemental Figure 5C).

207 To test potential functional redundancy between Raf36 and Raf22, a  
208 *raf22raf36-1* double knockout mutant was generated. In the presence of ABA,  
209 *raf22raf36-1* showed a stronger ABA-hypersensitive phenotype relative to individual  
210 *raf22* and *raf36-1* mutants (Figures 4E and 4F). In addition, expression of ABA- and  
211 stress-responsive genes *RD29B* and *RAB18* were hyper-induced in *raf22raf36-1*  
212 seedlings (Figures 4G and 4H). Moreover, leaf water loss was examined because  
213 ABA also controls stomatal closure. However, leaf water loss of *raf22raf36-1* and  
214 individual *raf22* and *raf36-1* plants was similar to that of wild-type plants  
215 (Supplemental Figure 5D), suggesting that Raf36 and/or Raf22 has a minor role in  
216 stomatal movements. Taken together, these results demonstrated that Raf36 and  
217 Raf22 function redundantly in ABA signaling during post-germinative growth stage.

218 To examine whether the protein kinase activity of Raf36 and Raf22 are  
219 required for its negative regulation of ABA response, several complemented lines  
220 with kinase-dead form were generated. As shown in Figure 5A, the wild-type Raf36  
221 complemented the ABA-hypersensitive phenotype of *raf36-1*, while the kinase-dead  
222 form of Raf36 (Raf36 K234N) could not. Similar results were also observed for  
223 *Raf22* (Supplemental Figure 6). These results suggested that the protein kinase

224 activities of Raf36 and Raf22 are required for its function in ABA signaling.

225

226 **Raf36 and Raf22 regulate a subset of protein phosphorylation network in ABA**  
227 **response**

228 To gain insight about ABA-responsive signaling pathway(s) that may be  
229 regulated by Raf36 and/or Raf22, we performed a comparative phosphoproteomic  
230 analysis of wild-type and *raf22raf36-1* seedlings treated with 50  $\mu$ M ABA for 0, 15,  
231 30 and 90 min. LC-MS/MS analysis identified a total of 1,500 phosphopeptides in  
232 both wild-type and the *raf22raf36-1* double mutant (Supplemental Dataset 1). Within  
233 this dataset 99% of identified phosphopeptides were singly phosphorylated  
234 (Supplemental Figure 7A). Phosphoserine, phosphothreonine, and  
235 phosphotyrosine accounted for 91.2%, 8.4% and 0.3% of phosphorylated residues,  
236 respectively (Supplemental Figure 7B). Consistent with the ABA-hypersensitive  
237 phenotype observed in the *raf22raf36-1* double mutant (Figures 4E and 4F),  
238 principal component analysis demonstrated that the phosphoproteome profiles of  
239 the ABA-treated *raf22raf36-1* mutant were different from that of ABA-treated  
240 wild-type (Figure 5B). In addition, the profiles of *raf22raf36-1* were significantly  
241 altered even before ABA treatment (Figure 5B).

242 Next, we identified phosphopeptides differentially regulated between  
243 wild-type and *raf22raf36-1*. ABA-responsive and Raf36 and/or Raf22 dependent  
244 phosphopeptides were screened by *P* value. After exogenous ABA treatment, 130

245 phosphopeptides were upregulated and 36 phosphopeptides were downregulated  
246 in wild-type plants (Figure 5C and Supplemental Dataset 2). In comparison with  
247 wild-type at each time point, a total of 416 and 175 phosphopeptides were  
248 upregulated and downregulated in *raf22raf36-1*, respectively (Figure 5C and  
249 Supplemental Dataset 2). Intriguingly, 53.8 % of ABA-upregulated phosphopeptides  
250 in wild-type were up- or down-regulated in *raf22raf36-1* double mutant, while 61.1 %  
251 of ABA-downregulated phosphopeptides in wild-type were up- or down-regulated in  
252 *raf22raf36-1*, indicating that large part of ABA-regulated phosphopeptides may be  
253 under the control of Raf36 and/or Raf22.

254         Subsets of phosphopeptides were further analyzed to evaluate potential  
255 differences in cellular responses to ABA between wild-type and *raf22raf36-1* plants.  
256 First, gene ontology (GO) analysis reported the term “response to abscisic acid” as  
257 significantly up- and down-regulated in the *raf22raf36-1* double mutant  
258 (Supplemental Figure 8C and 8D). In *raf22raf36-1*, RNA- and metabolism-related  
259 GO terms were significantly up- and down-regulated groups before ABA treatment,  
260 respectively (Supplemental Figures 9A and 9B). Second, we analyzed  
261 differentially-accumulating phosphopeptides for enrichment of motifs that  
262 correspond to kinase recognition sequences. Analysis using the algorithm motif-x  
263 (Wagih et al., 2016) identified two motifs, [-p(S/T)-P-] and [-(R/K)-x-x-p(S/T)-], that  
264 are MAPK- and SnRK2-/Calcium Dependent Protein Kinase (CDPK)-targeted  
265 sequences, respectively, as enriched in phosphopeptides from ABA-treated

266 wild-type (Supplemental Figure 10). In addition, [-p(S/T)-P-] and [-(R/K)-x-x-p(S/T)-]  
267 containing phosphopeptides were also enriched in *raf22raf36-1* double mutant as  
268 compared to wild-type at each time point. Together, these two motifs account for  
269 over 70% of phosphopeptides that differentially accumulate in response to ABA in  
270 both wild-type and *raf22raf36-1*. This indicates Raf36 and Raf22 are directly or  
271 indirectly related to regulation of [-p(S/T)-P-] and/or [-(R/K)-x-x-p(S/T)-] *in vivo*.

272 To confirm our phosphoproteomic data, a subset of peptides were selected  
273 that were upregulated by ABA in wild-type but downregulated in *raf22raf36-1*. These  
274 candidates were synthesized as GST-fused 31 amino acid peptides and subjected  
275 to *in vitro* phosphorylation assay. The amino acids 143-173 of OLEOSIN1 (OLE1)  
276 was used as a positive control, because a previous study reported OLE1 as a  
277 substrate of Raf22 at seed stage (Ramachandiran et al., 2018). Consistent with our  
278 phosphorylation motif analysis (Supplemental Figure 10), both [-(R/K)-x-x-p(S/T)-]  
279 and [-p(S/T)-P-] containing phosphopeptides (AT1G21630.1: Calcium-binding EF  
280 hand family protein, AT1G20760.1: Calcium-binding EF hand family protein and  
281 AT4G33050.3: calmodulin-binding family protein EDA39 for [-(R/K)-x-x-p(S/T)-]  
282 motif; AT1G60200.1: splicing factor PWI domain-containing protein RBM25,  
283 AT3G01540.2: DEAD-box RNA helicase 1 (DRH1), AT1G20440.1: cold-regulated  
284 47 (COR47) for [-p(S/T)-P-] motif) were directly phosphorylated by Raf22 (Figure  
285 5D).

286



## 288 **DISCUSSION**

289           SnRK2s are core components of abiotic stress signaling in plants, yet the  
290 full complement of SnRK2 substrates leading to responses necessary for stress  
291 tolerance remain unknown. To gain a better understanding of SnRK2-mediated  
292 signaling pathway(s), we aimed to identify signaling factors associated with SnRK2.  
293 In this study, Raf36 was identified as a candidate of SnRK2-interacting protein.  
294 Using several reverse genetic and biochemical analyses, we revealed that Raf36  
295 and Raf22 are novel SnRK2 substrates which negatively regulate ABA responses in  
296 a partially redundant manner at post-germination growth stage through their protein  
297 kinase activities.

298           Our loss-of-function analyses revealed that Raf36 negatively regulates ABA  
299 responses (Figures 2B, 2C, 2D, 2E and 2F). Notably, loss of *Raf36* altered the rate  
300 of cotyledon greening, but did not affect seed germination or leaf water loss  
301 (Supplemental Figures 3D, 5C and 5D). These results suggest that Raf36 may  
302 function specifically in regulating ABA-induced post-germination growth arrest, a  
303 physiological response that may allow germinated seeds to survive under  
304 unfavorable conditions (Hwang et al., 2018). Raf36 is a member of subgroup C5  
305 Raf-like MAPKKK family in Arabidopsis. Previous studies also reported that other  
306 group C kinases, Raf22 and Raf43, are associated with ABA responses, e.g. *raf22*  
307 mutant showed ABA-hypersensitive phenotype at post-germinative growth stage  
308 (Hwang et al., 2018) and *raf43* mutant showed ABA-hypersensitive phenotype at



309 seed germination stage (Virk et al., 2015). Our results demonstrated that Raf36 and  
310 Raf22 functions partially redundantly in ABA-mediated post-germination growth  
311 arrest, because *raf22raf36-1* double knockout mutant showed a stronger ABA  
312 hypersensitivity than in the individual single mutants (Figures 4E and 4F). In  
313 addition to regulating post-germination growth arrest, our results show that Raf36  
314 and Raf22 also regulate ABA-induced changes in gene expression and protein  
315 phosphorylation in older 1- or 2-week-old seedlings (Figures 4G, 4H, 5B, 5C,  
316 Supplemental Figures 8C and 8D). It has been known that some group C Raf-like  
317 kinases function in various tissues, e.g. HT1 or BLUE LIGHT-DEPENDENT  
318 H<sup>+</sup>-ATPASE PHOSPHORYLATION (BHP) in guard cells and Raf28 in  
319 embryogenesis (Hashimoto et al., 2006; Hayashi et al., 2017; Wang et al., 2018).  
320 Thus, Raf36 and Raf22 may also have different functions in different tissues and  
321 developmental stages.

322 In our experiments, kinase-dead forms of Raf36 or Raf22 did not  
323 complement phenotypes of *raf36-1* or *raf22* mutants, indicating that *in vivo* kinase  
324 activity of both proteins is necessary for regulating ABA responses (Figure 5A and  
325 Supplemental Figure 6). To identify possible substrates of Raf36 or Raf22, we  
326 performed a comparative phosphoproteomic analysis of ABA responses in wild-type  
327 and *raf22raf36-1* double mutant plants. Among phosphopeptides downregulated in  
328 *raf22raf36-1*, GO terms “Response to abscisic acid” or “Response to osmotic stress”  
329 were enriched (Supplemental Figure 8D), suggesting that Raf36 or Raf22 are

330 involved in ABA-responsive phosphosignaling pathways. Consistent with this,  
331 *raf22raf36-1* double mutant showed enhanced salt tolerance compared to wild-type  
332 or the single mutant plants (Supplemental Figure 11), indicating that Raf36 and  
333 Raf22 are involved in ABA signaling at least under certain stress conditions.  
334 Functional analyses of detected phosphoproteins will be required for further  
335 understanding of phosphosignaling pathways under the control of Raf36 or Raf22.  
336 Unexpectedly, phosphoproteomic profiling revealed that Raf36 or Raf22 regulate  
337 some phosphosignaling pathways even in the absence of exogenous ABA  
338 treatment (Figure 5B). This suggests that Raf36 or Raf22 may have some roles  
339 under non-stressed conditions. A recent investigation proposed that basal ABA  
340 levels under well-watered conditions modulate plant metabolism and growth  
341 (Yoshida et al., 2019). Given that not only GO terms “Response to abscisic acid” but  
342 also metabolism-related GO terms were significantly enriched in ABA-nontreated  
343 *raf22raf36-1* mutant (Supplemental Figure 9B) and that *raf36* or *raf22raf36-1*  
344 showed a slight growth retardation in a normal condition (Supplemental Figure 12),  
345 Raf36 or Raf22 may regulate responses to basal ABA levels under normal  
346 conditions. Further analysis will be required to address this possibility in the future.

347         Several previous studies proposed the relationship between SnRK2 and  
348 Raf-like kinases, e.g. HT1 or PpARK (Hůrak et al., 2016; Matrosova et al., 2015;  
349 Saruhashi et al., 2015; Tian et al., 2015). Actually, PpARK, a subgroup B3 Raf, has  
350 been known as a direct upstream regulator of SnRK2, i.e. PpARK can activate

351 SnRK2s by phosphorylating the activation loop of SnRK2 (Saruhashi et al., 2015).  
352 In this case, ARK acts as a positive regulator in ABA signaling in *Physcomitrella*  
353 *patens*. In addition, recent studies reported that Raf10, a subgroup B2 Raf, also  
354 acts as a positive regulator upstream of SnRK2s in Arabidopsis (Lee et al., 2015;  
355 Nguyen et al., 2019). In contrast to these results observed in group B Rafs, our  
356 results suggest that group C Rafs negatively regulate ABA signaling and that they  
357 are directly phosphorylated by SnRK2s. To clarify how they negatively regulate ABA  
358 responses, functional analysis of substrate candidates of Raf36 or Raf22, such as  
359 those from our phosphoproteomic data, will provide useful information for further  
360 understanding of group C Rafs in ABA signaling.

361

362

## 363 **METHODS**

### 364 **Plant Materials**

365 *Arabidopsis thaliana* ecotype Columbia (Col-0) was used as the wild-type. T-DNA  
366 insertion mutant lines, *raf36-1* (GK-459C10), *raf36-2* (SALK\_044426C) and *raf22*  
367 (SALK\_105195C) were obtained from ABRC or GABI-Kat. The *raf36-1raf22* double  
368 knockout mutant was generated by crossing *raf36-1* and *raf22*. The *SRK2E/OST1*  
369 knockout mutant, *srk2e* (SALK\_008068), was used as described previously  
370 (Yoshida et al., 2002). The *srk2dsrk2e* double mutant was established by crossing  
371 *srk2d* (GABI-Kat 807G04) and *srk2e*, and the *raf36-1srk2dsrk2e* triple mutant was  
372 generated by crossing *srk2dsrk2e* double mutant and *raf36-1*. Seeds of wild-type,  
373 mutants or transgenic plants were sterilized, and sown on GM agar plates as  
374 described (Umezawa et al., 2009). After vernalization at 4 °C in the dark for 4 days,  
375 they were incubated in a growth chamber under a continuous light condition at  
376 22 °C for indicated periods. To test ABA sensitivity, seeds were sown on GM agar  
377 medium with or without 0.5 µM ABA (Sigma, MO). Germination and greening rate  
378 were scored daily for 14 days according to previous study (Fujii et al., 2007).

379

### 380 **Plasmids**

381 In this study, vector constructions were performed with Gateway cloning technology  
382 (Invitrogen, CA) unless otherwise noted. SRK2D, SRK2E and SRK2I cDNAs were  
383 previously cloned into pENTR/D-TOPO vector (Invitrogen, CA) (Umezawa et al.,

384 2009). In addition, Raf36, Raf36 N (amino acid residues 1-206), Raf36 KD+C  
385 (207-525) and Raf22 cDNAs were cloned into pENTR/D-TOPO or pENTR1A vector  
386 and sequenced. Site-directed mutagenesis was carried out as previously described  
387 (Umezawa et al., 2013). Those cDNAs were transferred to destination vectors, such  
388 as pGBKT7 and pGADT7 (Takara Bio, Japan), pSITE-nEYFP-C1 and  
389 pSITE-cEYFP-N1 (ABRC), pGEX6p-2 (GE healthcare, IL) and pBE2113-GFP  
390 (Yoshida et al., 2002).

391

## 392 **Transgenic Plants**

393 The pBE2113 vector, which drives C-terminal GFP-tagged Raf36 or Raf22 protein  
394 under the control of the Cauliflower Mosaic Virus (CaMV) 35S promoter, was  
395 constructed as described above. The transformation vector was introduced into  
396 *Agrobacterium tumefaciens* strain GV3101 by electroporation and transformed into  
397 Arabidopsis plants as described (Umezawa et al., 2004). The transformation lines  
398 were selected on GM agar medium containing 50 µg/ mL kanamycin and 200 µg/  
399 mL claforan. Expression levels of transgene were checked by RT-PCR.

400

## 401 **AlphaScreen<sup>®</sup>**

402 The AlphaScreen<sup>®</sup> (Amplified Luminescent Proximity Homogeneous Assay) was  
403 carried out using an AlphaScreen<sup>®</sup> FLAG<sup>®</sup> (M2) Detection Kit (Perkin Elmer, MA) to  
404 detect protein-protein interactions. For screening of SnRK2-interacting MAPKKs,

405 15 MAPKKKs were selected at random from the entire family members. Then, the  
406 C-terminal FLAG (DYKDDDDK)-tagged MAPKKK proteins were expressed in  
407 wheat germ extract (WGE) from *in vitro* synthesized mRNA obtained from  
408 PCR-amplified cDNAs (Nomoto and Tada, 2018). The N-terminal biotinylated  
409 SnRK2 proteins, such as SRK2D, E and I, were also synthesized in WGE. The  
410 protein quality (i.e., efficient synthesis with the expected molecular weight) of  
411 FLAG-tagged MAPKKKs and biotinylated SnRK2s was confirmed by western  
412 blotting with an anti-FLAG antibody and streptavidin, respectively. The  
413 FLAG-tagged MAPKKKs and biotinylated SnRK2s were mixed with acceptor beads  
414 coated with anti-FLAG antibody, donor beads coated with streptavidin, 0.01 %  
415 Tween-20 and 0.1 % bovine serum albumin (BSA) in sterilized water-diluted control  
416 buffer provided in the kit and then incubated at 21 °C for 12 h. The AlphaScreen®  
417 luminescence was detected with the infinite® M1000 Pro (TECAN, Switzerland).  
418 WGE with no expressed proteins was employed as negative control (NC) to  
419 estimate the luminescence caused by endogenous wheat germ proteins.

420

#### 421 **Yeast two-hybrid analysis**

422 Yeast two-hybrid analysis was employed using the MatchMaker GAL4 Two-Hybrid  
423 System 3 (Takara Bio, Japan) as previously described (Umezawa et al., 2009).  
424 *Saccharomyces cerevisiae* strain AH109 was co-transformed with various pairs of  
425 pGBKT7 vectors harboring SnRK2s (i.e., SRK2D, SRK2E and SRK2I) and pGADT7

426 vectors harboring Raf36. A single colony for each transformant grown on  
427 SD/-leucine (L)/-tryptophan (W) media was incubated in liquid media, and then  
428 evaluated on SD media supplemented with or without 3-amino-1,2,4-triazole (3-AT)  
429 and lacking combinations of amino acids leucine (L), tryptophan (W) and histidine  
430 (H), as follows: -LW, -LWH, -LWH +10 mM 3-AT, -LWH +50 mM 3-AT or on SD  
431 media lacking L, W, H, and adenine (A), as follows: -LW, -LWH, -LWHA. The plates  
432 were incubated at 30 °C for the optimal period.

433

#### 434 **Microscopy analyses of fluorescent proteins**

435 To perform *Agrobacterium*-mediated bimolecular fluorescence complementation  
436 (BiFC) assay, pSITE-nEYFP-C1 vectors harboring SnRK2s (i.e., SRK2D, SRK2E  
437 and SRK2I) or pSITE-cEYFP-N1 vectors harboring Raf-like kinases (i.e., Raf36 and  
438 Raf22) were introduced to *A. tumefaciens* strain GV3101(p19) by electroporation. A  
439 single colony for each transformant was cultured in LB media, and the media was  
440 substituted by 1/2 GM liquid media supplemented with 0.1 mM acetosyringone.  
441 SnRK2 and Raf transformants were mixed with various pairs, and then infiltrated  
442 into *Nicotiana benthamiana* leaves. Complemented YFP fluorescence of each  
443 samples was observed in epidermal cells of *N. benthamiana* at 3 days after  
444 infiltration with a fluorescence microscope BX53 (Olympus, Japan). For analysis of  
445 subcellular localization of Raf36-GFP, mesophyll cells of 2-week-old transgenic  
446 Arabidopsis plants expressing Raf36-GFP were observed with a confocal

447 microscope SP8X (Leica Microsystems) with the time-gating method (Kodama,  
448 2016), which completely eliminates chlorophyll autofluorescence when GFP  
449 imaging. GFP fluorescence was observed with 484 nm excitation and 494-545 nm  
450 emission with a gating time of 0.3–12.0 nsec. Chlorophyll autofluorescence was  
451 separately observed with 554 nm excitation and 640–729 nm emission.

452

### 453 **Preparation of Recombinant Proteins**

454 DNA fragments of Raf36, Raf36 N (1-206), Raf36 KD+C (207-525), Raf36 KD  
455 (207-467), Raf36 N (1-156), Raf36 N (1-140), Raf22, Raf43, Raf28, SRK2D,  
456 SRK2E and SRK2I were amplified from cDNAs, and they were fused in-frame to  
457 pMAL-c5X vector (New England Biolabs, MA). Amino acid substitutions, such as  
458 Raf36 K234N, Raf22 K157N, Raf22 S81A K157N, Raf43 K228N, Raf28 K158N and  
459 SRK2E K50N, were introduced by site-directed mutagenesis. The MBP-fusion  
460 proteins were expressed and purified from *E. coli* BL21 (DE3) using Amylose Resin  
461 (New England Biolabs) according to the manufacturer's instructions. GST-SRK2E  
462 and GST-SRK2E K50N proteins were expressed using pGEX6p-2 (GE healthcare,  
463 IL) and purified using Glutathione Sepharose 4B resin (GE healthcare, IL). Both  
464 MBP-tagged and GST-tagged recombinant proteins were further purified with a  
465 Nanosep<sup>®</sup> 30-kDa size-exclusion column (PALL, NY). In addition, to identify  
466 phosphorylation sites in Raf36, six types of 30-amino-acid peptides with mutations  
467 were designed as Raf36 peptides (134-163) #1- #6 as shown in Fig. 3C. Similarly,



468 to confirm Raf22-dependent phosphorylation, six phosphopeptides and OLE1 as a  
469 positive control, were designed as 31-amino-acid peptides including the putative  
470 phosphorylation site(s). These peptides were expressed and purified from *E. coli*  
471 BL21 (DE3) using pGEX4T-3 vector (GE healthcare, IL).

472

### 473 ***In vitro* phosphorylation assay**

474 *In vitro* phosphorylation assays were performed as described previously with some  
475 modifications (Umezawa et al., 2009). The recombinant proteins of SnRK2, Raf or  
476 substrates were mixed with indicated pair(s) and incubated in 50 mM Tris-HCl (pH  
477 7.5), 5 mM MgCl<sub>2</sub> or 5 mM MnCl<sub>2</sub>, 50 μM ATP and 0.037 MBq of [γ-<sup>32</sup>P] ATP  
478 (PerkinElmer, MA) at 30 °C for 30 min. Samples were subsequently separated by  
479 SDS-PAGE, and phosphorylation levels were detected by autoradiography with  
480 BAS-5000 (Fujifilm, Japan).

481

### 482 **Water loss analysis**

483 To measure leaf water loss, 2-week-old seedlings were transferred from GM agar  
484 medium to soil, and the plants were grown under a 16 h/8 h (light/dark) photoperiod  
485 at 22 °C for another 2 weeks. The fully expanded rosette leaves were detached  
486 from 4- to 5-week-old plants and placed on weighing dishes. These dishes were  
487 kept under the same conditions used for seedling growth on soil, and then their  
488 fresh weights were monitored at the indicated times with three replicates per

489 time-point. One replicate consists of 5 individual leaves. Water loss was calculated  
490 as a percentage of relative weight at the indicated times versus initial fresh weight.

491

#### 492 **RNA extraction and qRT-PCR**

493 For quantitative reverse transcription PCR (qRT-PCR) analysis, total RNA was  
494 extracted by LiCl precipitation from 1-week-old seedlings treated with 50  $\mu$ M ABA  
495 for indicated periods. 1  $\mu$ g of total RNA treated with RNase-free DNase I (Nippon  
496 Gene, Japan) was used for reverse transcription with ReverTra Ace<sup>®</sup> reverse  
497 transcriptase (TOYOBO, Japan). qRT-PCR analysis was performed using GoTaq<sup>®</sup>  
498 qPCR Master Mix (Promega, WI) with Light Cycler 96 (Roche Life Science, CA). For  
499 normalization, *GAPDH* was used as an internal control. The gene-specific primers  
500 used for qRT-PCR analysis were shown in Dataset S5.

501

#### 502 **Phosphoproteomic analysis.**

503 Following imbibition with 50  $\mu$ M ABA, 2-week-old Arabidopsis seedling of wild-type  
504 (Col-0) and *raf22raf36-1* were used for phosphoproteomic analysis with three  
505 biological replicates. Total crude protein was extracted from grounded sample. The  
506 phosphoproteomic analyses were performed as previously described with 400  $\mu$ g of  
507 total crude protein (Ishikawa et al., 2019a, 2019b; Nakagami et al., 2010; Sugiyama  
508 et al., 2007; Umezawa et al., 2013). Enriched phosphopeptides by using HAMMOC  
509 method (Sugiyama et al., 2007) were analyzed with a LC-MS/MS system,

510 TripleTOF 5600 (AB-SCIEX). Peptides and proteins were identified using the  
511 database (TAIR 10) with Mascot (Matrix Science, version 2.4.0). The false  
512 discovery score was calculated using Benjamini-Hochberg method and set to 5 %.  
513 Each phosphorylation site was assessed by the site localization probability score  
514 calculated with the mascot delta score and defined confident as > 0.75 (Ishikawa et  
515 al., 2019a). Skyline version 4.2 (Maccoss lab software) was used for quantification  
516 of phosphopeptides on the basis of LC-MS peak area. All raw data files were  
517 deposited in the Japan Proteome Standard Repository Database (jPOST;  
518 JPST000630, <https://repository.jpostdb.org/preview/20386920535e1580015868a>,  
519 access key; 3457). Each phosphoproteomic sample was compared by principal  
520 component analysis by using all identified phosphopeptides and their  
521 phosphorylation level. The motif analysis was conducted using the Motif-X  
522 algorithm. DAVID (<https://david.ncifcrf.gov>) and REViGO (<http://revigo.irb.hr>) were  
523 used for GO analysis.

524

## 525 **Accession numbers**

526 Sequence data from this article can be found in the GenBank/EMBL data libraries  
527 under the following accession numbers: *SRK2D*, *AT3G50500*; *SRK2E*, *AT4G33950*,  
528 *SRK2I*, *AT5G66880*, *Raf36*, *AT5G58950*; *Raf22*, *AT2G24360*; *Raf43*, *AT3G46930*;  
529 *Raf28*, *AT4G31170*; *RD29B*, *AT5G52300*, *RAB18*, *AT5G66400* and *OLE1*,  
530 *AT4G25140*.

531

532 **Supplemental Information**

533 **Supplemental Figure 1.** AlphaScreen<sup>®</sup> assay for screening of SnRK2-interacting  
534 MAPKKKs.

535 **Supplemental Figure 2.** A phylogenetic tree of Arabidopsis Raf-like kinases.

536 **Supplemental Figure 3.** Isolation and characterization of *raf36-1* and *raf36-2*  
537 T-DNA insertion lines.

538 **Supplemental Figure 4.** *in vitro* phosphorylation assays determining preference for  
539 Mg<sup>2+</sup> or Mn<sup>2+</sup>.

540 **Supplemental Figure 5.** The characterization of Raf22 in ABA response.

541 **Supplemental Figure 6.** Raf22 protein kinase activity is required for its function in  
542 ABA signaling.

543 **Supplemental Figure 7.** An overview of phosphoproteomic analysis.

544 **Supplemental Figure 8.** GO analysis of phosphopeptides in wild-type and  
545 *raf22raf36-1*.

546 **Supplemental Figure 9.** GO analysis of phosphopeptides in *raf22raf36-1* in normal  
547 condition.

548 **Supplemental Figure 10.** Motif analysis of phosphopeptides in wild-type and  
549 *raf22raf36-1*.

550 **Supplemental Figure 11.** Salt tolerance of *raf22raf36-1* plants.

551 **Supplemental Figure 12.** Dwarf phenotype of *raf36* and *raf22raf36-1* plants under

552 normal condition.

553 **Supplemental Dataset 1.** List of phosphopeptides detected in this study.

554 **Supplemental Dataset 2.** List of responded phosphopeptides during ABA  
555 treatment.

556 **Supplemental Dataset 3.** List of GO terms for phosphopeptides in this study.

557 **Supplemental Dataset 4.** Classification of phosphopeptides by motif groups.

558 **Supplemental Dataset 5.** Primer sequences used for quantitative RT-PCR  
559 (qRT-PCR).

560

## 561 **Acknowledgments**

562 We thank Dr. Yoichi Sakata (Tokyo University of Agriculture, Japan), Dr. Jose´ M.  
563 Barrero (CSIRO, Australia) and Dr. Paul E. Verslues (Academia Sinica, Taiwan) for  
564 valuable discussion. We also thank Tomotaka Itaya, Ryo Yoshimura (Nagoya  
565 University, Japan) and Mrs. Saho Mizukado (RIKEN, Japan) for their expert  
566 technical assistance. We are grateful to ABRC and GABI-Kat project for providing  
567 Arabidopsis T-DNA insertional mutants. This work was partly supported by the  
568 Japan Society for the Promotion of Science (JSPS) KAKENHI [JP15H04383,  
569 16KK0160, 19H03240] to T.U., and JST PRESTO [P13413773] to T.U.

570

## 571 **Conflict of interest**

572 The authors declare no conflict of interest.

573

## 574 **Author contributions**

575 Yo.K. and T.U. designed research; Yo.K., M.H., S.I., F.M. and S.K. performed  
576 research; F.T., M.N., K.I., Yu.K., Y.T., D.T. and K.S. contributed new  
577 reagents/analysis tools; Yo.K., S.I., F.M. and S.K. analyzed data; and Yo.K., S.C.P.  
578 and T.U. wrote the paper.

579

## 580 **Figure Legends**

### 581 **Figure 1. Raf36 interacts with subclass III SnRK2s.**

582 (A) AlphaScreen<sup>®</sup> assay shows interaction of Raf36 and subclass III SnRK2s. Bars  
583 indicate means  $\pm$  standard error (n=3), and asterisks indicate significant differences  
584 by Student's *t* test ( $P < 0.05$ ). (B) Yeast two-hybrid (Y2H) assay shows interaction  
585 between Raf36 and subclass III SnRK2s. Yeast cells expressing GAL4AD:Raf36  
586 and GAL4BD:SnRK2s fusion proteins were incubated on SD media supplemented  
587 with or without 3-amino-1,2,4-triazole (3-AT) and lacking combinations of amino  
588 acids leucine (L), tryptophan (W) and histidine (H), as follows (in order from low to  
589 high stringency): -LW, -LWH, -LWH +10 mM 3-AT, -LWH +50 mM 3-AT. Photographs  
590 were taken at 10 days (SRK2D and SRK2E) or 12 days (SRK2I) after incubation.  
591 (C) Subcellular localization of Raf36-GFP in leaf mesophyll cells. Chl indicates  
592 chlorophyll autofluorescence. Scale bar, 20  $\mu$ m. (D) BiFC assays for Raf36 and  
593 subclass III SnRK2s. SnRK2 and Raf36 were transiently expressed in *N.*

594 *benthamiana* leaves by *Agrobacterium* infiltration. Empty vector constructs were  
595 used as negative controls. nEYFP and cEYFP represent the N- and C-terminal  
596 fragments of the EYFP, respectively. BF indicates bright field images. Scale bar, 50  
597  $\mu\text{m}$ . (E) Y2H assay for truncated versions of Raf36 and SRK2E. Yeast cells  
598 co-expressing GAL4AD:Raf36, Raf36 N or Raf36 KD+C and GAL4BD:SRK2E  
599 fusion proteins were incubated on SD media lacking L, W, H, and adenine (A), as  
600 follows (in order from low to high stringency): -LW, -LWH, -LWHA.

601

602 **Figure 2. Raf36 negatively regulates SnRK2-dependent ABA response**  
603 **phenotypes in Arabidopsis seedlings.**

604 (A) Abundance of *Raf36* mRNA transcripts measured by quantitative RT-PCR. Total  
605 RNA was extracted from 1-week-old wild-type (WT) Col-0 Arabidopsis seedlings  
606 treated with 50  $\mu\text{M}$  ABA for indicated periods. Bars indicate means  $\pm$  standard error  
607 (n=3), and asterisks indicate significant differences by Student's *t* test (\**P* < 0.05,  
608 \*\**P* < 0.01). (B and C) Quantification of the cotyledon greening rates of WT (Col-0),  
609 *raf36-1* and *raf36-2* on GM agar medium with or without 0.5  $\mu\text{M}$  ABA. Data are  
610 means  $\pm$  standard error (n=3). Each replicate contains 36 seeds. Photographs were  
611 taken 6 days after vernalization. (D) Functional complementation of *raf36-1* by  
612 *CaMV35S:Raf36-GFP*. Shown in photograph of seedlings grown for 7 days on GM  
613 agar medium in the presence or absence of 0.5  $\mu\text{M}$  ABA. (E and F) Quantification of  
614 the cotyledon greening rates of WT (Col-0), *raf36-1*, *srk2dsrk2e* and

615 *raf36-1srk2dsrk2e* on GM agar medium in the presence or absence of 0.5  $\mu$ M ABA.

616 Data are means  $\pm$  standard error (n=3). Each replicate contains 36 seeds.

617 Photographs were taken 6 days after vernalization.

618

619 **Figure 3. Subclass III SnRK2s directly phosphorylate Raf36.**

620 (A) *In vitro* phosphorylation assay using kinase-dead forms of GST-SRK2E (SRK2E

621 K50N) or MBP-Raf36 (Raf36 K234N). Each kinase-dead form was co-incubated

622 with an active GST-SRK2E or MBP-Raf36 kinase as indicated. Assays were

623 performed in the presence of 5 mM  $Mn^{2+}$  (left 3 lanes) or 5 mM  $Mg^{2+}$  (right 3 lanes)

624 with [ $\gamma$ - $^{32}P$ ] ATP. (B) *In vitro* phosphorylation assay using truncated forms of

625 MBP-tagged Raf36. Each MBP-Raf36 protein was incubated with MBP-SRK2E in

626 the presence of 5 mM  $Mg^{2+}$  with [ $\gamma$ - $^{32}P$ ] ATP. N: N-terminal region, KD: kinase

627 domain, C: C-terminal region. (C) Schematic representation of six Raf36 (134-163)

628 peptides tested as SRK2E substrates. Ser141, Ser145, Ser150 and Ser155 are

629 labeled in blue, with alanine substitutions shown in red. Ser157, labeled in green,

630 was replaced with alanine in Raf36 (134-163) peptides #1- #5. (D) *In vitro*

631 phosphorylation of Raf36 peptides by MBP-SRK2E. (E) *In vitro* phosphorylation of

632 GST-Raf36 (134-163) peptide #3 by MBP-SRK2D or MBP-SRK2I. Autoradiography

633 ( $^{32}P$ ) and CBB staining (CBB) show protein phosphorylation and loading,

634 respectively.

635



636 **Figure 4. Raf22, a C6 Raf-like kinase, functions redundantly with Raf36.**

637 (A) Phylogenetic tree of subfamily C5 and C6 Raf-like kinases in Arabidopsis. (B) *In*  
638 *vitro* phosphorylation of C5/C6 Raf kinases by GST-tagged SRK2E. MBP-tagged  
639 kinase-dead forms of Raf43 (Raf43 K228N), Raf22 (Raf22 K157N) or Raf28 (Raf28  
640 K158N) were used as substrates. (C) *In vitro* phosphorylation of kinase-dead Raf22  
641 (K157N) and Raf22 (S81A K157N) proteins by GST-SRK2E. (D) BiFC assay of  
642 Raf22 and SRK2E in *N. benthamiana* leaves. nEYFP and cEYFP represent the N-  
643 and C-terminal fragments of the EYFP, respectively. BF indicates bright field images.  
644 Scale bar, 50  $\mu$ m. (E and F) Quantification of the cotyledon greening rates of  
645 wild-type (Col-0), *raf36-1*, *raf22* and *raf22raf36-1* on GM agar medium with or  
646 without 0.5  $\mu$ M ABA. Data are means  $\pm$  standard error (n=4). Each replicate  
647 contains 36 seeds. Photographs were taken 9 days after vernalization. (G and H)  
648 Relative gene expression of ABA-responsive genes. Total RNA was extracted from  
649 1-week-old plants including wild-type, *raf36-1*, *raf22* and *raf22raf36-1* treated with  
650 50  $\mu$ M ABA for indicated periods. Bars indicate means  $\pm$  standard error (n=3) and  
651 asterisks indicate significant differences by Student's *t* test (\**P* < 0.05, \*\**P* < 0.01).

652

653 **Figure 5. Phosphoproteomic analysis of wild-type and *raf22raf36-1* identifies**  
654 **ABA signaling components downstream of Raf kinases.**

655 (A) Functional complementation of *raf36-1* by *CaMV35S:Raf36-GFP* or *Raf36*  
656 *K234N-GFP*. Shown in photograph of seedlings grown for 7 days on GM agar

657 medium in the presence or absence of 0.5  $\mu$ M ABA. (B) Principal component  
658 analysis of phosphoproteomic profiles of wild-type (WT) and *raf22raf36-1*. (C) Venn  
659 diagram of up- or down-regulated phosphopeptides in WT seedlings after 50  $\mu$ M  
660 ABA treatment, and up- or down-regulated phosphopeptides in *raf22raf36-1*  
661 compared to WT ( $P < 0.05$ ). (D) *In vitro* phosphorylation of GST-tagged  
662 phosphopeptides from proteins AT1G21630.1 (lane 3), AT1G20760.1 (lane 4),  
663 AT4G33050.3 (lane 5), AT1G60200.1 (lane 6), AT3G01540.2 (lane 7),  
664 AT1G20440.1 (lane 8) by MBP-Raf22. GST (lane 1) and GST-OLE1 fragment  
665 (143-173 aa, lane 2) were included as negative and positive controls, respectively.  
666 The autoradiography ( $^{32}$ P) and CBB staining (CBB) show protein phosphorylation  
667 and loading, respectively.

668

669 **Supplemental Figure 1. AlphaScreen<sup>®</sup> assay for screening of**  
670 **SnRK2-interacting MAPKKKs.**

671 Interaction of SnRK2 with MAPKKKs was tested by AlphaScreen<sup>®</sup> assay. N-terminal  
672 biotin-tagged SRK2I protein and C-terminal FLAG-tagged MAPKKK proteins were  
673 synthesized by *in vitro* translation system in wheat germ extracts. After incubating in  
674 a reaction buffer including AlphaScreen<sup>®</sup> acceptor and donor beads for 12 h, the  
675 AlphaScreen<sup>®</sup> luminescence intensity was analyzed with a multi-mode plate reader  
676 (TECAN M1000pro).

677

678 **Supplemental Figure 2. A phylogenetic tree of Arabidopsis Raf-like kinases.**

679 Amino acid sequences of predicted kinase domains from Raf-like kinases were  
680 aligned using ClustalW. The phylogenetic tree was generated using MEGA-X  
681 software with the neighbor-joining method. The Raf-like kinases were classified as  
682 B1- B4 and C1- C7 subfamilies, according to Ichimura et al., 2002. The C5  
683 subfamily is shown in bold red letters.

684

685 **Supplemental Figure 3. Isolation and characterization of *raf36-1* and *raf36-2***  
686 **T-DNA insertion lines.**

687 (A) Schematic depiction of *Raf36* genomic DNA with T-DNA insertions. Black boxes  
688 and lines indicate exons and introns, respectively. (B) RT-PCR analysis of *Raf36*  
689 transcript levels in wild-type (Col-0), *raf36-1* and *raf36-2* seedlings. *GAPDH* was  
690 used as a positive control. (C) RT-PCR analysis of *Raf36* transcript levels in *raf36-1*  
691 and complementation lines (*comp#3* and *comp#4*). *GAPDH* was used as a positive  
692 control. (D) Germination rates of wild-type (Col-0), *raf36-1* and *raf36-2* on GM agar  
693 medium in the presence or absence of 0.5  $\mu$ M ABA. Data are means  $\pm$  standard  
694 error (n=3). Each replicate contains 36 seeds.

695

696 **Supplemental Figure 4. *in vitro* phosphorylation assays determining**  
697 **preference for Mg<sup>2+</sup> or Mn<sup>2+</sup>.**

698 (A) Effects of Mg<sup>2+</sup> or Mn<sup>2+</sup> on kinase activity of Raf36. MBP-tagged Raf36 and

699  $\alpha$ -casein were incubated with [ $\gamma$ - $^{32}$ P] ATP in the presence of 5 mM Mg $^{2+}$  (left) or 5  
700 mM Mn $^{2+}$  (right). Autophosphorylation (upper) and substrate phosphorylation  
701 (lower) signals were visualized by autoradiography. Coomassie Brilliant Blue (CBB)  
702 staining shows protein loading. (B) Effects of Mg $^{2+}$  or Mn $^{2+}$  on kinase activity of  
703 SRK2E. MBP-tagged SRK2E and histone as substrate were co-incubated with  
704 [ $\gamma$ - $^{32}$ P] ATP in the presence of 5 mM Mg $^{2+}$  (left) or 5 mM Mn $^{2+}$  (right).  
705 Autophosphorylation (upper) and substrate phosphorylation (lower) signals were  
706 visualized by autoradiography. Coomassie Brilliant Blue (CBB) staining shows  
707 protein loading. (C) *In vitro* phosphorylation assay to identify  
708 SnRK2-phosphorylation site(s) in the N-terminal region of Raf36.

709

#### 710 **Supplemental Figure 5. The characterization of Raf22 in ABA response.**

711 (A) qRT-PCR analysis of *Raf22* mRNA transcript abundance. Total RNA was  
712 extracted from 1-week-old wild-type seedlings treated with 50  $\mu$ M ABA for indicated  
713 periods. Bars indicate means  $\pm$  standard error (n=3). Asterisks showed significant  
714 differences by Student's *t* test (\**P* < 0.05, \*\**P* < 0.01). (B) BiFC assays of Raf22 and  
715 SnRK2s. SRK2D or SRK2I were transiently expressed with Raf22 in *N.*  
716 *benthamiana* leaves by Agrobacterium infiltration. nEYFP and cEYFP represent the  
717 N- and C-terminal fragments of the EYFP, respectively. BF indicates bright field  
718 images. Scale bar, 50  $\mu$ m. (C) Germination rates of wild-type (Col-0), *raf36-1*, *raf22*  
719 and *raf22raf36-1* on GM agar medium with/without 0.5  $\mu$ M ABA. Data are means  $\pm$

720 standard error (n=3). Each replicate contains 36 seeds. (D) Water loss from  
721 detached leaves of wild-type (Col-0), *raf36-1*, *raf22* and *raf22raf36-1* plants. The  
722 *srk2e* mutant was included as a positive control. Data are means  $\pm$  standard error  
723 (n=3). Each replicate consists of five individual leaves.

724

725 **Supplemental Figure 6. Raf22 protein kinase activity is required for its**  
726 **function in ABA signaling.**

727 Functional complementation of *raf22* mutant by introducing *Raf22-GFP* or *Raf22*  
728 *K157N-GFP*. Photographs were taken 7 days after vernalization.

729

730 **Supplemental Figure 7. An overview of phosphoproteomic analysis.**

731 (A) Distribution of the number of phosphosites per peptide. (B) Distribution of  
732 phosphorylated residues in each peptide. *pS*, *pT* and *pY* indicate phospho-serine,  
733 phospho-threonine and phospho-tyrosine, respectively.

734

735 **Supplemental Figure 8. GO analysis of phosphopeptides in wild-type and**  
736 ***raf22raf36-1*.**

737 Each graph represents GO terms for upregulated (A) and downregulated  
738 phosphopeptides (B) in ABA-treatment wild-type (WT) seedlings, or GO terms of  
739 up- (C) or down-regulated phosphopeptides (D) in *raf22raf36-1* as compared with  
740 WT. GO terms were evaluated by DAVID program and visualized with REVIGO ( $P <$

741 0.05). Circle color and size show *P* value and frequency (%), respectively.

742

743 **Supplemental Figure 9. GO analysis of phosphopeptides in *raf22raf36-1* in**  
744 **normal condition.**

745 Each graph represents GO terms for phosphopeptides up- (A) or down-regulated  
746 (B) in *raf22raf36-1* under normal condition ( $P < 0.05$ ). GO terms were evaluated by  
747 DAVID program and visualized with REVIGO.

748

749 **Supplemental Figure 10. Motif analysis of phosphopeptides in wild-type and**  
750 ***raf22raf36-1*.**

751 Phosphorylation motifs in up- or down-regulated phosphopeptides in response to  
752 ABA in wild-type seedlings, and motifs in up- or down-regulated phosphopeptides in  
753 *raf22raf36-1* in comparison with wild-type.

754

755 **Supplemental Figure 11. Salt tolerance of *raf22raf36-1* plants.**

756 Wild-type (Col-0), *raf36-1*, *raf22* and *raf22raf36-1* seeds were germinated on GM  
757 agar medium with or without 150 mM NaCl. Photographs were taken 19 days after  
758 vernalization.

759

760 **Supplemental Figure 12. Dwarf phenotype of *raf36* and *raf22raf36-1* plants**  
761 **under normal condition.**

762 Wild-type, *raf22*, *raf36* and *raf22raf36-1* plants grown at 22°C under 16/8 h

763 photoperiod for 29 days. Scale bar, 3 cm.

764

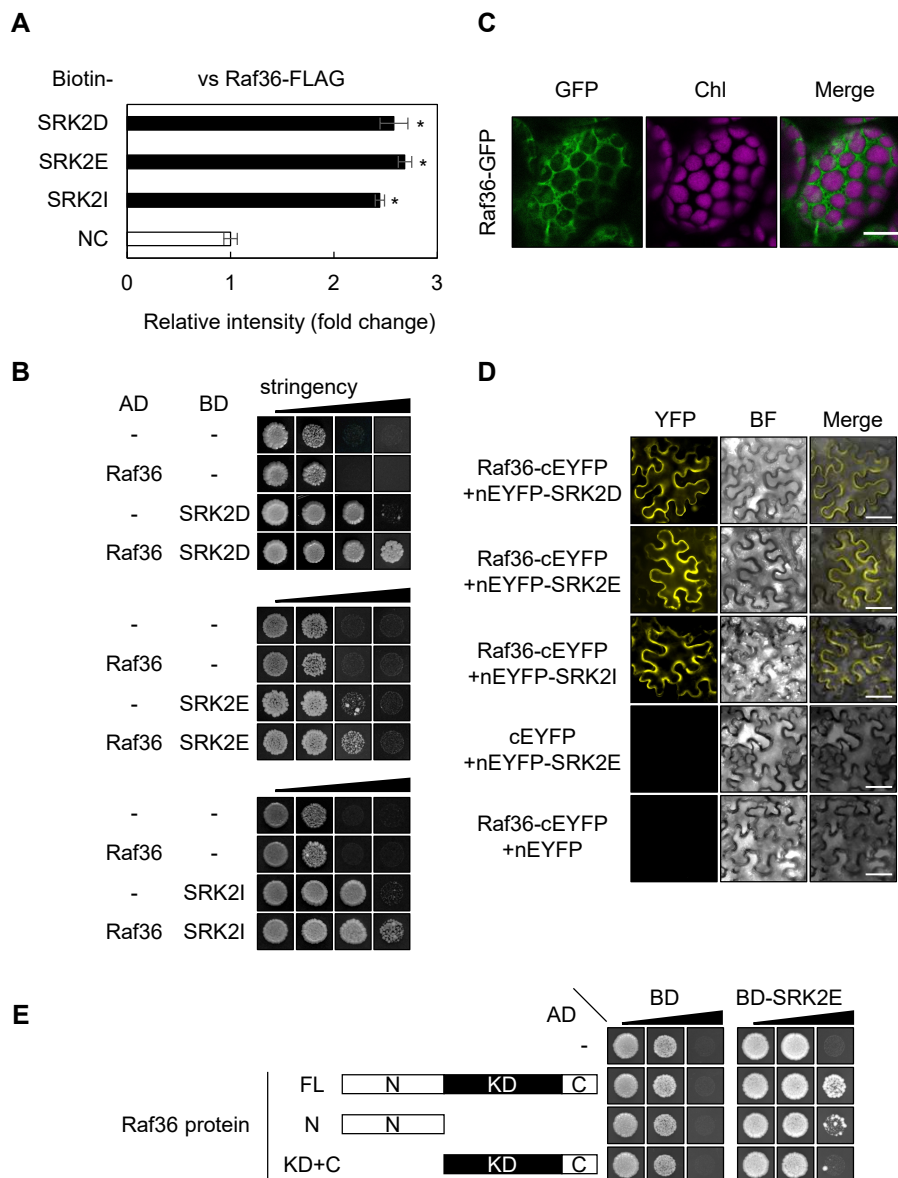

**Figure 1. Raf36 interacts with subclass III SnRK2s.**

(A) AlphaScreen® assay shows interaction of Raf36 and subclass III SnRK2s. Bars indicate means  $\pm$  standard error ( $n=3$ ), and asterisks indicate significant differences by Student's  $t$  test ( $P < 0.05$ ). (B) Yeast two-hybrid (Y2H) assay shows interaction between Raf36 and subclass III SnRK2s. Yeast cells expressing GAL4AD:Raf36 and GAL4BD:SnRK2s fusion proteins were incubated on SD media supplemented with or without 3-amino-1,2,4-triazole (3-AT) and lacking combinations of amino acids leucine (L), tryptophan (W) and histidine (H), as follows (in order from low to high stringency): -LW, -LWH, -LWH +10 mM 3-AT, -LWH +50 mM 3-AT. Photographs were taken at 10 days (SRK2D and SRK2E) or 12 days (SRK2I) after incubation. (C) Subcellular localization of Raf36-GFP in leaf mesophyll cells. Chl indicates chlorophyll autofluorescence. Scale bar, 20  $\mu$ m. (D) BiFC assays for Raf36 and subclass III SnRK2s. SnRK2 and Raf36 were transiently expressed in *N. benthamiana* leaves by Agrobacterium infiltration. Empty vector constructs were used as negative controls. nEYFP and cEYFP represent the N- and C-terminal fragments of the EYFP, respectively. BF indicates bright field images. Scale bar, 50  $\mu$ m. (E) Y2H assay for truncated versions of Raf36 and SRK2E. Yeast cells co-expressing GAL4AD:Raf36, Raf36 N or Raf36 KD+C and GAL4BD:SRK2E fusion proteins were incubated on SD media lacking L, W, H, and adenine (A), as follows (in order from low to high stringency): -LW, -LWH, -LWHA.



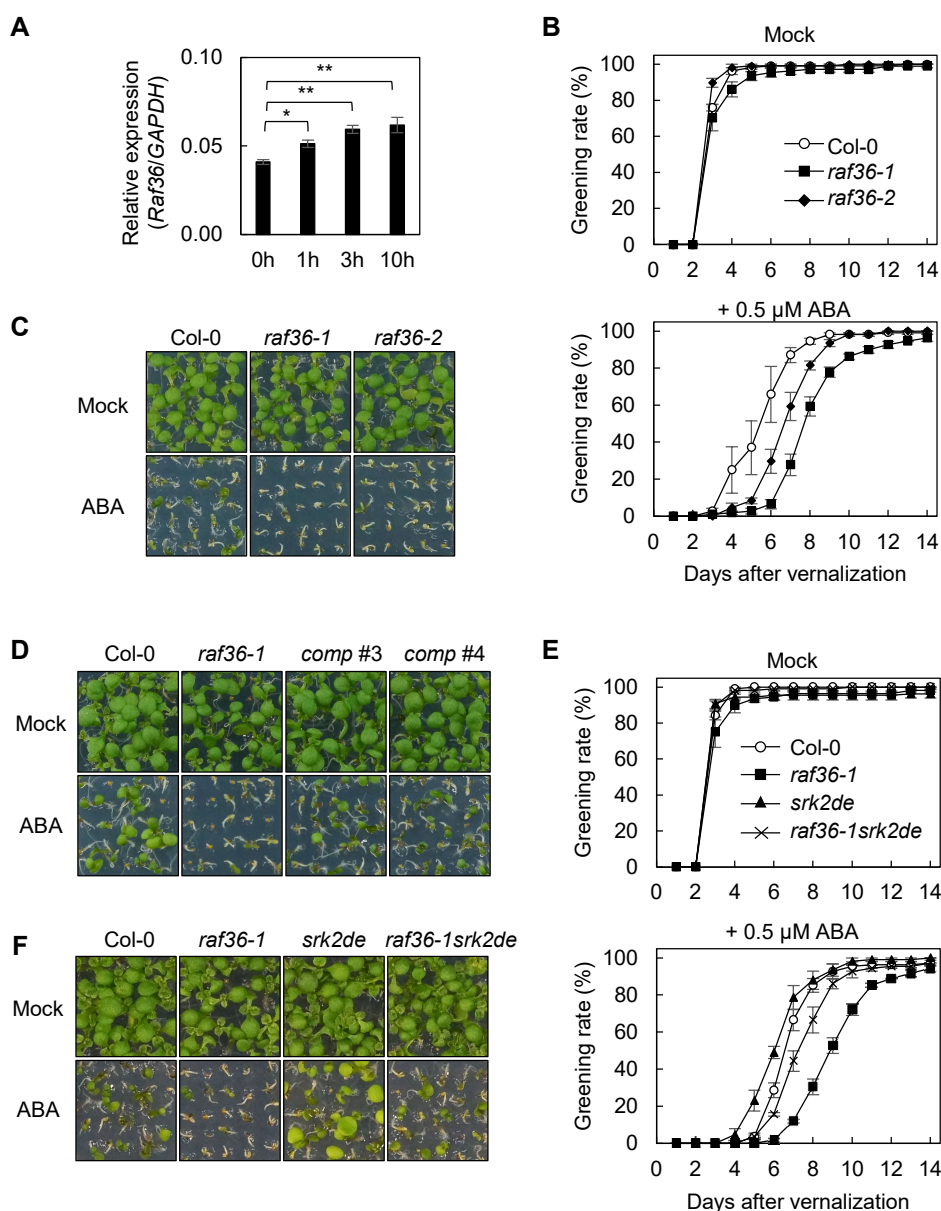

**Figure 2. Raf36 negatively regulates SnRK2-dependent ABA response phenotypes in Arabidopsis seedlings.**

(A) Abundance of *Raf36* mRNA transcripts measured by quantitative RT-PCR. Total RNA was extracted from 1-week-old wild-type (WT) Col-0 Arabidopsis seedlings treated with 50  $\mu$ M ABA for indicated periods. Bars indicate means  $\pm$  standard error (n=3), and asterisks indicate significant differences by Student's *t* test (\**P* < 0.05, \*\**P* < 0.01). (B and C) Quantification of the cotyledon greening rates of WT (Col-0), *raf36-1* and *raf36-2* on GM agar medium with or without 0.5  $\mu$ M ABA. Data are means  $\pm$  standard error (n=3). Each replicate contains 36 seeds. Photographs were taken 6 days after vernalization. (D) Functional complementation of *raf36-1* by *CaMV35S:Raf36-GFP*. Shown in photograph of seedlings grown for 7 days on GM agar medium in the presence or absence of 0.5  $\mu$ M ABA. (E and F) Quantification of the cotyledon greening rates of WT (Col-0), *raf36-1*, *srk2dsrk2e* and *raf36-1srk2dsrk2e* on GM agar medium in the presence or absence of 0.5  $\mu$ M ABA. Data are means  $\pm$  standard error (n=3). Each replicate contains 36 seeds. Photographs were taken 6 days after vernalization.

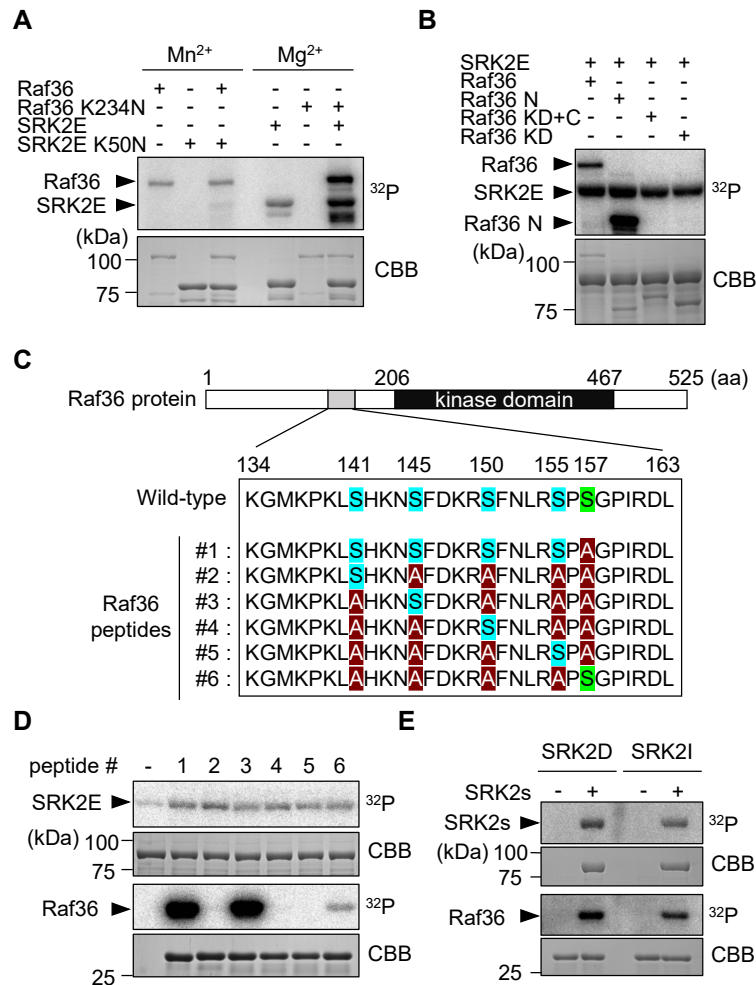

### Figure 3. Subclass III SnRK2s directly phosphorylate Raf36.

(A) *In vitro* phosphorylation assay using kinase-dead forms of GST-SRK2E (SRK2E K50N) or MBP-Raf36 (Raf36 K234N). Each kinase-dead form was co-incubated with an active GST-SRK2E or MBP-Raf36 kinase as indicated. Assays were performed in the presence of 5 mM Mn<sup>2+</sup> (left 3 lanes) or 5 mM Mg<sup>2+</sup> (right 3 lanes) with [ $\gamma$ -<sup>32</sup>P] ATP. (B) *In vitro* phosphorylation assay using truncated forms of MBP-tagged Raf36. Each MBP-Raf36 protein was incubated with MBP-SRK2E in the presence of 5 mM Mg<sup>2+</sup> with [ $\gamma$ -<sup>32</sup>P] ATP. N: N-terminal region, KD: kinase domain, C: C-terminal region. (C) Schematic representation of six Raf36 (134-163) peptides tested as SRK2E substrates. Ser141, Ser145, Ser150 and Ser155 are labeled in blue, with alanine substitutions shown in red. Ser157, labeled in green, was replaced with alanine in Raf36 (134-163) peptides #1- #5. (D) *In vitro* phosphorylation of Raf36 peptides by MBP-SRK2E. (E) *In vitro* phosphorylation of GST-Raf36 (134-163) peptide #3 by MBP-SRK2D or MBP-SRK2I. Autoradiography (<sup>32</sup>P) and CBB staining (CBB) show protein phosphorylation and loading, respectively.

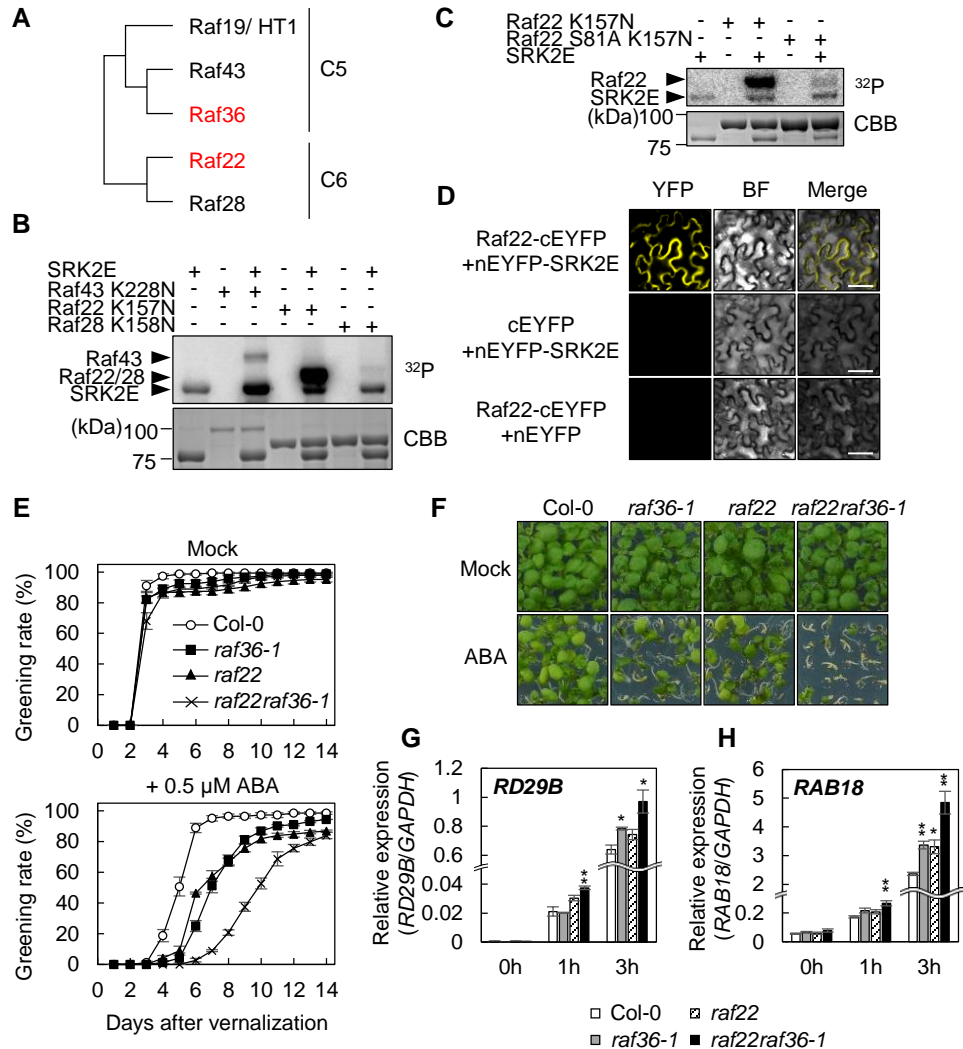

**Figure 4. Raf22, a C6 Raf-like kinase, functions redundantly with Raf36.**

(A) Phylogenetic tree of subfamily C5 and C6 Raf-like kinases in Arabidopsis. (B) *In vitro* phosphorylation of C5/C6 Raf kinases by GST-tagged SRK2E. MBP-tagged kinase-dead forms of Raf43 (Raf43 K228N), Raf22 (Raf22 K157N) or Raf28 (Raf28 K158N) were used as substrates. (C) *In vitro* phosphorylation of kinase-dead Raf22 (K157N) and Raf22 (S81A K157N) proteins by GST-SRK2E. (D) BiFC assay of Raf22 and SRK2E in *N. benthamiana* leaves. nEYFP and cEYFP represent the N- and C-terminal fragments of the EYFP, respectively. BF indicates bright field images. Scale bar, 50  $\mu$ m. (E and F) Quantification of the cotyledon greening rates of wild-type (Col-0), *raf36-1*, *raf22* and *raf22raf36-1* on GM agar medium with or without 0.5  $\mu$ M ABA. Data are means  $\pm$  standard error (n=4). Each replicate contains 36 seeds. Photographs were taken 9 days after vernalization. (G and H) Relative gene expression of ABA-responsive genes. Total RNA was extracted from 1-week-old plants including wild-type, *raf36-1*, *raf22* and *raf22raf36-1* treated with 50  $\mu$ M ABA for indicated periods. Bars indicate means  $\pm$  standard error (n=3) and asterisks indicate significant differences by Student's *t* test (\**P* < 0.05, \*\**P* < 0.01).

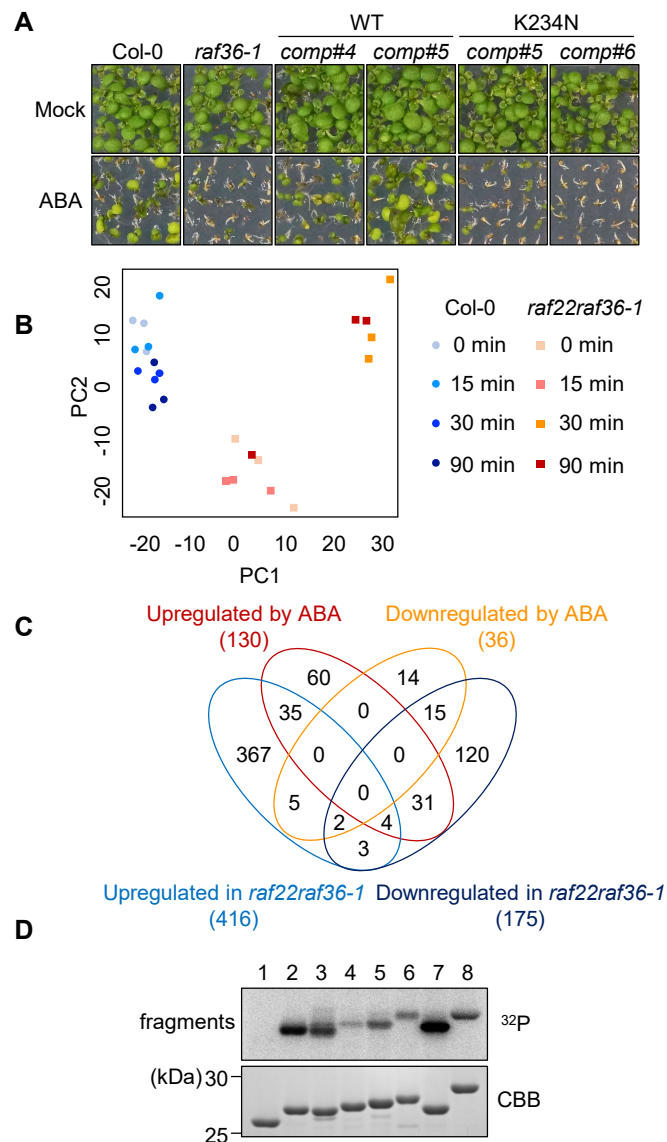

**Figure 5. Phosphoproteomic analysis of wild-type and *raf22raf36-1* identifies ABA signaling components downstream of Raf kinases.**

(A) Functional complementation of *raf36-1* by *CaMV35S:Raf36-GFP* or *Raf36 K234N-GFP*. Shown in photograph of seedlings grown for 7 days on GM agar medium in the presence or absence of 0.5  $\mu$ M ABA. (B) Principal component analysis of phosphoproteomic profiles of wild-type (WT) and *raf22raf36-1*. (C) Venn diagram of up- or down-regulated phosphopeptides in WT seedlings after 50  $\mu$ M ABA treatment, and up- or down-regulated phosphopeptides in *raf22raf36-1* compared to WT ( $P < 0.05$ ). (D) *In vitro* phosphorylation of GST-tagged phosphopeptides from proteins AT1G21630.1 (lane 3), AT1G20760.1 (lane 4), AT4G33050.3 (lane 5), AT1G60200.1 (lane 6), AT3G01540.2 (lane 7), AT1G20440.1 (lane 8) by MBP-Raf22. GST (lane 1) and GST-OLE1 fragment (143-173 aa, lane 2) were included as negative and positive controls, respectively. The autoradiography ( $^{32}$ P) and CBB staining (CBB) show protein phosphorylation and loading, respectively.

## Parsed Citations

Cutler, S.R., Rodriguez, P.L., Finkelstein, R.R., and Abrams, S.R. (2010). Abscisic Acid: Emergence of a Core Signaling Network. *Annu. Rev. Plant Biol.* 61: 651–679.

Pubmed: [Author and Title](#)

Google Scholar: [Author Only Title Only Author and Title](#)

Finkelstein, R. (2013). Abscisic Acid Synthesis and Response. *Arab. Book Am. Soc. Plant Biol.* 11.

Pubmed: [Author and Title](#)

Google Scholar: [Author Only Title Only Author and Title](#)

Fujii, H., Verslues, P.E., and Zhu, J.-K. (2007). Identification of Two Protein Kinases Required for Abscisic Acid Regulation of Seed Germination, Root Growth, and Gene Expression in Arabidopsis. *Plant Cell* 19: 485–494.

Pubmed: [Author and Title](#)

Google Scholar: [Author Only Title Only Author and Title](#)

Fujii, H. and Zhu, J.-K. (2009). Arabidopsis mutant deficient in 3 abscisic acid-activated protein kinases reveals critical roles in growth, reproduction, and stress. *Proc. Natl. Acad. Sci.* 106: 8380–8385.

Pubmed: [Author and Title](#)

Google Scholar: [Author Only Title Only Author and Title](#)

Fujita, Y. et al. (2009). Three SnRK2 Protein Kinases are the Main Positive Regulators of Abscisic Acid Signaling in Response to Water Stress in Arabidopsis. *Plant Cell Physiol.* 50: 2123–2132.

Pubmed: [Author and Title](#)

Google Scholar: [Author Only Title Only Author and Title](#)

Furihata, T., Maruyama, K., Fujita, Y., Umezawa, T., Yoshida, R., Shinozaki, K., and Yamaguchi-Shinozaki, K. (2006). Abscisic acid-dependent multisite phosphorylation regulates the activity of a transcription activator AREB1. *Proc. Natl. Acad. Sci.* 103: 1988–1993.

Pubmed: [Author and Title](#)

Google Scholar: [Author Only Title Only Author and Title](#)

Geiger, D., Scherzer, S., Mumm, P., Stange, A., Marten, I., Bauer, H., Ache, P., Matschi, S., Liese, A., Al-Rasheid, K.A.S., Romeis, T., and Hedrich, R. (2009). Activity of guard cell anion channel SLAC1 is controlled by drought-stress signaling kinase-phosphatase pair. *Proc. Natl. Acad. Sci.* 106: 21425–21430.

Pubmed: [Author and Title](#)

Google Scholar: [Author Only Title Only Author and Title](#)

Hashimoto, M., Negi, J., Young, J., Israelsson, M., Schroeder, J.I., and Iba, K. (2006). Arabidopsis HT1 kinase controls stomatal movements in response to CO<sub>2</sub>. *Nat. Cell Biol.* 8: 391–397.

Pubmed: [Author and Title](#)

Google Scholar: [Author Only Title Only Author and Title](#)

Hashimoto-Sugimoto, M., Negi, J., Monda, K., Higaki, T., Isogai, Y., Nakano, T., Hasezawa, S., and Iba, K. (2016). Dominant and recessive mutations in the Raf-like kinase HT1 gene completely disrupt stomatal responses to CO<sub>2</sub> in Arabidopsis. *J. Exp. Bot.* 67: 3251–3261.

Pubmed: [Author and Title](#)

Google Scholar: [Author Only Title Only Author and Title](#)

Hayashi, M., Inoue, S., Ueno, Y., and Kinoshita, T. (2017). A Raf-like protein kinase BHP mediates blue light-dependent stomatal opening. *Sci. Rep.* 7: 45586.

Pubmed: [Author and Title](#)

Google Scholar: [Author Only Title Only Author and Title](#)

Hörak, H. et al. (2016). A Dominant Mutation in the HT1 Kinase Uncovers Roles of MAP Kinases and GHR1 in CO<sub>2</sub>-Induced Stomatal Closure. *Plant Cell* 28: 2493–2509.

Pubmed: [Author and Title](#)

Google Scholar: [Author Only Title Only Author and Title](#)

Hrabak, E.M. et al. (2003). The Arabidopsis CDPK-SnRK Superfamily of Protein Kinases. *Plant Physiol.* 132: 666–680.

Pubmed: [Author and Title](#)

Google Scholar: [Author Only Title Only Author and Title](#)

Hwang, J.-U., Yim, S., Do, T.H.T., Kang, J., and Lee, Y. (2018). Arabidopsis thaliana Raf22 protein kinase maintains growth capacity during postgerminative growth arrest under stress. *Plant Cell Environ.* 41: 1565–1578.

Pubmed: [Author and Title](#)

Google Scholar: [Author Only Title Only Author and Title](#)

Ichimura, K. et al. (2002). Mitogen-activated protein kinase cascades in plants: a new nomenclature. *Trends Plant Sci.* 7: 301–308.

Pubmed: [Author and Title](#)

Google Scholar: [Author Only Title Only Author and Title](#)

Ishikawa, S., Barrero, J., Takahashi, F., Peck, S., Gubler, F., Shinozaki, K., and Umezawa, T. (2019a). Comparative phosphoproteomic analysis of barley embryos with different dormancy during imbibition. *Int. J. Mol. Sci.* 20: 451.

Pubmed: [Author and Title](#)



Google Scholar: [Author Only](#) [Title Only](#) [Author and Title](#)

**Ishikawa, S., Barrero, J.M., Takahashi, F., Nakagami, H., Peck, S.C., Gubler, F., Shinozaki, K., and Umezawa, T. (2019b). Comparative Phosphoproteomic Analysis Reveals a Decay of ABA Signaling in Barley Embryos during After-Ripening. *Plant Cell Physiol.***

Pubmed: [Author and Title](#)

Google Scholar: [Author Only](#) [Title Only](#) [Author and Title](#)

**Kodama, Y. (2016). Time Gating of Chloroplast Autofluorescence Allows Clearer Fluorescence Imaging In Planta. *PLOS ONE* 11: e0152484.**

Pubmed: [Author and Title](#)

Google Scholar: [Author Only](#) [Title Only](#) [Author and Title](#)

**Lamberti, G., Gügel, I.L., Meurer, J., Soll, J., and Schwenkert, S. (2011). The Cytosolic Kinases STY8, STY17, and STY46 Are Involved in Chloroplast Differentiation in Arabidopsis. *Plant Physiol.* 157: 70–85.**

Pubmed: [Author and Title](#)

Google Scholar: [Author Only](#) [Title Only](#) [Author and Title](#)

**Lee, S., Lee, M.H., Kim, J.-I., and Kim, S.Y. (2015). Arabidopsis Putative MAP Kinase Kinases Raf10 and Raf11 are Positive Regulators of Seed Dormancy and ABA Response. *Plant Cell Physiol.* 56: 84–97.**

Pubmed: [Author and Title](#)

Google Scholar: [Author Only](#) [Title Only](#) [Author and Title](#)

**Matrosova, A., Bogireddi, H., Mateo-Peñas, A., Hashimoto-Sugimoto, M., Iba, K., Schroeder, J.I., and Israelsson-Nordström, M. (2015). The HT1 protein kinase is essential for red light-induced stomatal opening and genetically interacts with OST1 in red light and CO<sub>2</sub>-induced stomatal movement responses. *New Phytol.* 208: 1126–1137.**

Pubmed: [Author and Title](#)

Google Scholar: [Author Only](#) [Title Only](#) [Author and Title](#)

**Nakagami, H., Sugiyama, N., Mochida, K., Daudi, A., Yoshida, Y., Toyoda, T., Tomita, M., Ishihama, Y., and Shirasu, K. (2010). Large-Scale Comparative Phosphoproteomics Identifies Conserved Phosphorylation Sites in Plants. *Plant Physiol.* 153: 1161–1174.**

Pubmed: [Author and Title](#)

Google Scholar: [Author Only](#) [Title Only](#) [Author and Title](#)

**Nakashima, K., Fujita, Y., Kanamori, N., Katagiri, T., Umezawa, T., Kidokoro, S., Maruyama, K., Yoshida, T., Ishiyama, K., Kobayashi, M., Shinozaki, K., and Yamaguchi-Shinozaki, K. (2009). Three Arabidopsis SnRK2 Protein Kinases, SRK2D/SnRK2.2, SRK2E/SnRK2.6/OST1 and SRK2I/SnRK2.3, Involved in ABA Signaling are Essential for the Control of Seed Development and Dormancy. *Plant Cell Physiol.* 50: 1345–1363.**

Pubmed: [Author and Title](#)

Google Scholar: [Author Only](#) [Title Only](#) [Author and Title](#)

**Nguyen, Q.T.C., Lee, S., Choi, S., Na, Y., Song, M., Hoang, Q.T.N., Sim, S.Y., Kim, M.-S., Kim, J.-I., Soh, M.-S., and Kim, S.Y. (2019). Arabidopsis Raf-Like Kinase Raf10 Is a Regulatory Component of Core ABA Signaling. *Mol. Cells* 42.**

Pubmed: [Author and Title](#)

Google Scholar: [Author Only](#) [Title Only](#) [Author and Title](#)

**Nomoto, M. and Tada, Y. (2018). Cloning-free template DNA preparation for cell-free protein synthesis via two-step PCR using versatile primer designs with short 3'-UTR. *Genes Cells* 23: 46–53.**

Pubmed: [Author and Title](#)

Google Scholar: [Author Only](#) [Title Only](#) [Author and Title](#)

**Ramachandiran, I., Vijayakumar, A., Ramya, V., and Rajasekharan, R. (2018). Arabidopsis serine/threonine/tyrosine protein kinase phosphorylates oil body proteins that regulate oil content in the seeds. *Sci. Rep.* 8: 1154.**

Pubmed: [Author and Title](#)

Google Scholar: [Author Only](#) [Title Only](#) [Author and Title](#)

**Reddy, M.M. and Rajasekharan, R. (2006). Role of threonine residues in the regulation of manganese-dependent arabidopsis serine/threonine/tyrosine protein kinase activity. *Arch. Biochem. Biophys.* 455: 99–109.**

Pubmed: [Author and Title](#)

Google Scholar: [Author Only](#) [Title Only](#) [Author and Title](#)

**Rudrabhatla, P., Reddy, M.M., and Rajasekharan, R. (2006). Genome-Wide Analysis and Experimentation of Plant Serine/Threonine/Tyrosine-Specific Protein Kinases. *Plant Mol. Biol.* 60: 293–319.**

Pubmed: [Author and Title](#)

Google Scholar: [Author Only](#) [Title Only](#) [Author and Title](#)

**Saruhashi, M., Ghosh, T.K., Arai, K., Ishizaki, Y., Hagiwara, K., Komatsu, K., Shiwa, Y., Izumikawa, K., Yoshikawa, H., Umezawa, T., Sakata, Y., and Takezawa, D. (2015). Plant Raf-like kinase integrates abscisic acid and hyperosmotic stress signaling upstream of SNF1-related protein kinase2. *Proc. Natl. Acad. Sci.* 112: E6388–E6396.**

Pubmed: [Author and Title](#)

Google Scholar: [Author Only](#) [Title Only](#) [Author and Title](#)

**Shinozaki, K., Yamaguchi-Shinozaki, K., and Seki, M. (2003). Regulatory network of gene expression in the drought and cold stress responses. *Curr. Opin. Plant Biol.* 6: 410–417.**

Pubmed: [Author and Title](#)

Google Scholar: [Author Only](#) [Title Only](#) [Author and Title](#)

Stevenson, S.R. et al. (2016). Genetic analysis of *Physcomitrella patens* identifies ABCISIC ACID NON-RESPONSIVE (ANR), a regulator of ABA responses unique to basal land plants and required for desiccation tolerance. *Plant Cell*: tpc.00091.2016.

Pubmed: [Author and Title](#)

Google Scholar: [Author Only Title Only Author and Title](#)

Sugiyama, N., Masuda, T., Shinoda, K., Nakamura, A., Tomita, M., and Ishihama, Y. (2007). Phosphopeptide Enrichment by Aliphatic Hydroxy Acid-modified Metal Oxide Chromatography for Nano-LC-MS/MS in Proteomics Applications. *Mol. Cell. Proteomics* 6: 1103–1109.

Pubmed: [Author and Title](#)

Google Scholar: [Author Only Title Only Author and Title](#)

Tian, W. et al. (2015). A molecular pathway for CO<sub>2</sub> response in *Arabidopsis* guard cells. *Nat. Commun.* 6: 6057.

Pubmed: [Author and Title](#)

Google Scholar: [Author Only Title Only Author and Title](#)

Umazawa, T., Nakashima, K., Miyakawa, T., Kuromori, T., Tanokura, M., Shinozaki, K., and Yamaguchi-Shinozaki, K. (2010). Molecular Basis of the Core Regulatory Network in ABA Responses: Sensing, Signaling and Transport. *Plant Cell Physiol.* 51: 1821–1839.

Pubmed: [Author and Title](#)

Google Scholar: [Author Only Title Only Author and Title](#)

Umazawa, T., Sugiyama, N., Mizoguchi, M., Hayashi, S., Myouga, F., Yamaguchi-Shinozaki, K., Ishihama, Y., Hirayama, T., and Shinozaki, K. (2009). Type 2C protein phosphatases directly regulate abscisic acid-activated protein kinases in *Arabidopsis*. *Proc. Natl. Acad. Sci.* 106: 17588–17593.

Pubmed: [Author and Title](#)

Google Scholar: [Author Only Title Only Author and Title](#)

Umazawa, T., Sugiyama, N., Takahashi, F., Anderson, J.C., Ishihama, Y., Peck, S.C., and Shinozaki, K. (2013). Genetics and Phosphoproteomics Reveal a Protein Phosphorylation Network in the Abscisic Acid Signaling Pathway in *Arabidopsis thaliana*. *Sci. Signal.* 6: rs8–rs8.

Pubmed: [Author and Title](#)

Google Scholar: [Author Only Title Only Author and Title](#)

Umazawa, T., Yoshida, R., Maruyama, K., Yamaguchi-Shinozaki, K., and Shinozaki, K. (2004). SRK2C, a SNF1-related protein kinase 2, improves drought tolerance by controlling stress-responsive gene expression in *Arabidopsis thaliana*. *Proc. Natl. Acad. Sci.* 101: 17306–17311.

Pubmed: [Author and Title](#)

Google Scholar: [Author Only Title Only Author and Title](#)

Virk, N., Li, D., Tian, L., Huang, L., Hong, Y., Li, X., Zhang, Y., Liu, B., Zhang, H., and Song, F. (2015). *Arabidopsis* Raf-Like Mitogen-Activated Protein Kinase Kinase Kinase Gene Raf43 Is Required for Tolerance to Multiple Abiotic Stresses. *PLOS ONE* 10: e0133975.

Pubmed: [Author and Title](#)

Google Scholar: [Author Only Title Only Author and Title](#)

Wagih, O., Sugiyama, N., Ishihama, Y., and Beltrao, P. (2016). Uncovering Phosphorylation-Based Specificities through Functional Interaction Networks. *Mol. Cell. Proteomics* 15: 236–245.

Pubmed: [Author and Title](#)

Google Scholar: [Author Only Title Only Author and Title](#)

Wang, B., Liu, G., Zhang, J., Li, Y., Yang, H., and Ren, D. (2018). The RAF-like mitogen-activated protein kinase kinase kinases RAF22 and RAF28 are required for the regulation of embryogenesis in *Arabidopsis*. *Plant J.* 96: 734–747.

Pubmed: [Author and Title](#)

Google Scholar: [Author Only Title Only Author and Title](#)

Wang, P., Xue, L., Batelli, G., Lee, S., Hou, Y.-J., Oosten, M.J.V., Zhang, H., Tao, W.A., and Zhu, J.-K. (2013). Quantitative phosphoproteomics identifies SnRK2 protein kinase substrates and reveals the effectors of abscisic acid action. *Proc. Natl. Acad. Sci.* 110: 11205–11210.

Pubmed: [Author and Title](#)

Google Scholar: [Author Only Title Only Author and Title](#)

Yasumura, Y., Pierik, R., Kelly, S., Sakuta, M., Voesenek, L.A.C.J., and Harberd, N.P. (2015). An Ancestral Role for CONSTITUTIVE TRIPLE RESPONSE1 Proteins in Both Ethylene and Abscisic Acid Signaling. *Plant Physiol.* 169: 283–298.

Pubmed: [Author and Title](#)

Google Scholar: [Author Only Title Only Author and Title](#)

Yoshida, R., Hobo, T., Ichimura, K., Mizoguchi, T., Takahashi, F., Aronso, J., Ecker, J.R., and Shinozaki, K. (2002). ABA-Activated SnRK2 Protein Kinase is Required for Dehydration Stress Signaling in *Arabidopsis*. *Plant Cell Physiol.* 43: 1473–1483.

Pubmed: [Author and Title](#)

Google Scholar: [Author Only Title Only Author and Title](#)

Yoshida, T., Christmann, A., Yamaguchi-Shinozaki, K., Grill, E., and Fernie, A.R. (2019). Revisiting the Basal Role of ABA—Roles Outside of Stress. *Trends Plant Sci.* 24: 625–635.

Pubmed: [Author and Title](#)

Google Scholar: [Author Only Title Only Author and Title](#)
